# Supplementary material for: Prevalence of Pathogenic and Potentially Pathogenic Inborn Error of Immunity Associated Variants in Children with Severe Sepsis
Source: Springer Nature journal article supplement (doi:10.1007/s10875-021-01183-4), 2022-01-01
Supplement: MOESM5 [file 19988210]

|                    | Culture Negative |               |                        |                            | Blood Culture |                |                        |                            | Urine Culture |                 |                        |                            | Respiratory Culture |                |                        |                            | Respiratory Virus |                |                        |                            |
|--------------------|------------------|---------------|------------------------|----------------------------|---------------|----------------|------------------------|----------------------------|---------------|-----------------|------------------------|----------------------------|---------------------|----------------|------------------------|----------------------------|-------------------|----------------|------------------------|----------------------------|
|                    | OR               | 95% CI        | Fishers <i>p</i> value | BH adjusted <i>p</i> value | OR            | 95% CI         | Fishers <i>p</i> value | BH adjusted <i>p</i> value | OR            | 95% CI          | Fishers <i>p</i> value | BH adjusted <i>p</i> value | OR                  | 95% CI         | Fishers <i>p</i> value | BH adjusted <i>p</i> value | OR                | 95% CI         | Fishers <i>p</i> value | BH adjusted <i>p</i> value |
| Any                | 0.6              | ( 0.4 - 0.9 ) | 0.0131                 | 0.0721                     | 2.8           | ( 1.1 - 7.1 )  | 0.030                  | 0.082                      | 8.2           | ( 1.1 - 64.1 )  | 0.0186                 | 0.0683                     | 1.6                 | ( 0.9 - 2.7 )  | 0.0897                 | 0.2358                     | 1.6               | ( 0.9 - 2.8 )  | 0.1062                 | 0.5794                     |
| Multiple           | 0.4              | ( 0.2 - 0.7 ) | 0.0042                 | 0.0463                     | 4.3           | ( 1.5 - 12.5 ) | 0.008                  | 0.046                      | 9.6           | ( 1.0 - 87.5 )  | 0.0322                 | 0.0709                     | 2.2                 | ( 1.1 - 4.4 )  | 0.0275                 | 0.1513                     | 1.3               | ( 0.6 - 2.9 )  | 0.5474                 | 0.7527                     |
| Complement         | 0.6              | ( 0.3 - 1.0 ) | 0.0411                 | 0.1123                     | 2.8           | ( 1.0 - 7.9 )  | 0.070                  | 0.154                      | 7.4           | ( 0.9 - 64.6 )  | 0.0842                 | 0.1322                     | 1.7                 | ( 0.9 - 3.3 )  | 0.1072                 | 0.2358                     | 1.3               | ( 0.7 - 2.5 )  | 0.4927                 | 0.7527                     |
| Autoinflammation   | 0.6              | ( 0.3 - 1.0 ) | 0.0612                 | 0.1123                     | 2.4           | ( 0.8 - 7.2 )  | 0.151                  | 0.238                      | 9.0           | ( 1.0 - 78.2 )  | 0.0276                 | 0.0709                     | 1.6                 | ( 0.8 - 3.1 )  | 0.2258                 | 0.3549                     | 1.4               | ( 0.7 - 2.8 )  | 0.3682                 | 0.7527                     |
| Combined Syndromic | 0.5              | ( 0.2 - 1.1 ) | 0.1377                 | 0.1894                     | 4.7           | ( 1.3 - 16.7 ) | 0.023                  | 0.082                      | 0.0           | ( 0.0 - NA )    | 1.0000                 | 1.0000                     | 2.9                 | ( 1.2 - 7.0 )  | 0.0229                 | 0.1513                     | 2.3               | ( 0.9 - 5.8 )  | 0.1116                 | 0.5794                     |
| Innate             | 0.6              | ( 0.2 - 1.4 ) | 0.2397                 | 0.2636                     | 6.9           | ( 1.9 - 25.3 ) | 0.007                  | 0.046                      | 6.8           | ( 0.4 - 113.1 ) | 0.2497                 | 0.3433                     | 1.4                 | ( 0.5 - 4.2 )  | 0.5534                 | 0.6764                     | 1.6               | ( 0.5 - 4.7 )  | 0.5362                 | 0.7527                     |
| Phagocyte          | 0.3              | ( 0.1 - 1.0 ) | 0.0554                 | 0.1123                     | 1.5           | ( 0.2 - 13.2 ) | 0.542                  | 0.542                      | 32.3          | ( 3.1 - 334.5 ) | 0.0034                 | 0.0377                     | 2.8                 | ( 0.9 - 8.6 )  | 0.0913                 | 0.2358                     | 1.2               | ( 0.3 - 4.5 )  | 0.7333                 | 0.8066                     |
| Dysregulation      | 0.4              | ( 0.1 - 1.1 ) | 0.1108                 | 0.1742                     | 3.0           | ( 0.5 - 16.0 ) | 0.213                  | 0.261                      | 0.0           | ( 0.0 - NA )    | 1.0000                 | 1.0000                     | 1.0                 | ( 0.3 - 3.7 )  | 1.0000                 | 1.0000                     | 1.1               | ( 0.3 - 4.1 )  | 1.0000                 | 1.0000                     |
| Bone Marrow        | 1.3              | ( 0.4 - 4.3 ) | 0.7729                 | 0.7729                     | 1.7           | ( 0.2 - 15.5 ) | 0.495                  | 0.542                      | 0.0           | ( 0.0 - NA )    | 1.0000                 | 1.0000                     | 0.8                 | ( 0.2 - 3.7 )  | 1.0000                 | 1.0000                     | 1.4               | ( 0.4 - 5.5 )  | 0.7054                 | 0.8066                     |
| Ab                 | 0.4              | ( 0.1 - 1.4 ) | 0.1905                 | 0.2328                     | 5.2           | ( 0.9 - 29.8 ) | 0.102                  | 0.187                      | 32.3          | ( 2.6 - 394.6 ) | 0.0133                 | 0.0683                     | 1.8                 | ( 0.4 - 7.5 )  | 0.4185                 | 0.5754                     | 2.0               | ( 0.5 - 8.3 )  | 0.3944                 | 0.7527                     |
| Cellular & Humoral | 0.0              | ( 0.0 - NA )  | 0.0464                 | 0.1123                     | 6.9           | ( 0.6 - 76.5 ) | 0.195                  | 0.261                      | 43.0          | ( 2.1 - 862.7 ) | 0.0590                 | 0.1082                     | 4.2                 | ( 0.6 - 31.3 ) | 0.1808                 | 0.3314                     | 4.7               | ( 0.6 - 34.8 ) | 0.1580                 | 0.5794                     |
