# Supplementary material for: Prevalence of Pathogenic and Potentially Pathogenic Inborn Error of Immunity Associated Variants in Children with Severe Sepsis
Source: Springer Nature journal article supplement (doi:10.1007/s10875-021-01183-4), 2022-01-01
Supplement: MOESM6 [file 19988210]

|                    | Ferritin >500ng/ml |                |                        |                            | CRP >10mg/dl |               |                        |                            | Plts < 150,000/ul |               |                        |                            | Lymphocytes <1000/ul |               |                        |                            |
|--------------------|--------------------|----------------|------------------------|----------------------------|--------------|---------------|------------------------|----------------------------|-------------------|---------------|------------------------|----------------------------|----------------------|---------------|------------------------|----------------------------|
|                    | OR                 | 95% CI         | Fishers <i>p</i> value | BH adjusted <i>p</i> value | OR           | 95% CI        | Fishers <i>p</i> value | BH adjusted <i>p</i> value | OR                | 95% CI        | Fishers <i>p</i> value | BH adjusted <i>p</i> value | OR                   | 95% CI        | Fishers <i>p</i> value | BH adjusted <i>p</i> value |
| Any                | 2.2                | ( 1.3 - 3.7 )  | 0.0039                 | 0.0108                     | 1.7          | ( 1.1 - 2.7 ) | 0.0183                 | 0.0753                     | 1.8               | ( 1.1 - 2.8 ) | 0.0161                 | 0.0589                     | 1.7                  | ( 1.1 - 2.6 ) | 0.0296                 | 0.2973                     |
| Multiple           | 3.4                | ( 1.7 - 6.7 )  | 0.0006                 | 0.0023                     | 1.6          | ( 0.9 - 3.1 ) | 0.1549                 | 0.3591                     | 2.3               | ( 1.2 - 4.5 ) | 0.0113                 | 0.0589                     | 1.2                  | ( 0.6 - 2.2 ) | 0.6355                 | 0.699                      |
| Complement         | 2.1                | ( 1.2 - 3.9 )  | 0.0185                 | 0.0346                     | 1.9          | ( 1.1 - 3.3 ) | 0.0205                 | 0.0753                     | 1.8               | ( 1 - 3.2 )   | 0.0392                 | 0.1078                     | 1.5                  | ( 0.9 - 2.6 ) | 0.171                  | 0.3751                     |
| Autoinflammation   | 1.7                | ( 0.9 - 3.2 )  | 0.1265                 | 0.1989                     | 1.5          | ( 0.8 - 2.6 ) | 0.1959                 | 0.3591                     | 1.3               | ( 0.7 - 2.3 ) | 0.3909                 | 0.5312                     | 1.6                  | ( 0.9 - 2.8 ) | 0.1467                 | 0.3751                     |
| Combined Syndromic | 6.1                | ( 2.5 - 14.8 ) | 0.0001                 | 0.0006                     | 2.9          | ( 1.2 - 7.2 ) | 0.0195                 | 0.0753                     | 7.8               | ( 2.2 - 27 )  | 0.0002                 | 0.0022                     | 2.6                  | ( 1 - 6.6 )   | 0.0541                 | 0.2973                     |
| Innate             | 3.4                | ( 1.3 - 9.2 )  | 0.0189                 | 0.0346                     | 1.5          | ( 0.6 - 3.9 ) | 0.4721                 | 0.6275                     | 2.9               | ( 1 - 8.5 )   | 0.0542                 | 0.1193                     | 2.1                  | ( 0.8 - 5.9 ) | 0.1558                 | 0.3751                     |
| Phagocyte          | 1.5                | ( 0.4 - 5.2 )  | 0.5012                 | 0.5513                     | 0.6          | ( 0.2 - 1.9 ) | 0.5836                 | 0.6419                     | 2.7               | ( 0.8 - 8.8 ) | 0.11                   | 0.2017                     | 1.4                  | ( 0.5 - 4.1 ) | 0.5989                 | 0.699                      |
| Dysregulation      | 7                  | ( 2.3 - 21.1 ) | 0.0005                 | 0.0023                     | 2.1          | ( 0.7 - 6 )   | 0.1949                 | 0.3591                     | 1.6               | ( 0.6 - 4.7 ) | 0.4346                 | 0.5312                     | 1.5                  | ( 0.5 - 4.4 ) | 0.5968                 | 0.699                      |
| Bone Marrow        | 1.3                | ( 0.3 - 4.9 )  | 0.719                  | 0.719                      | 2            | ( 0.6 - 6.4 ) | 0.2609                 | 0.4099                     | 1.1               | ( 0.4 - 3.5 ) | 1                      | 1                          | 1.1                  | ( 0.3 - 3.3 ) | 1                      | 1                          |
| Ab                 | 2.8                | ( 0.7 - 10.7 ) | 0.2157                 | 0.2637                     | 0.5          | ( 0.1 - 2.1 ) | 0.5134                 | 0.6275                     | 2.3               | ( 0.6 - 9.1 ) | 0.3303                 | 0.5191                     | 0.4                  | ( 0.1 - 1.6 ) | 0.2046                 | 0.3751                     |
| Cellular & Humoral | 4.2                | ( 0.6 - 31.3 ) | 0.1808                 | 0.2485                     | 1.2          | ( 0.2 - 9.1 ) | 1                      | 1                          | 1                 | ( 0.1 - 7.1 ) | 1                      | 1                          | 0.3                  | ( 0 - 3 )     | 0.3548                 | 0.5575                     |
